# Supplementary material
Source: PubMed Central journal article supplement (PMC2593664)
Supplement: pp.108.128199_1.pdf [file pp.108.128199_1.pdf]

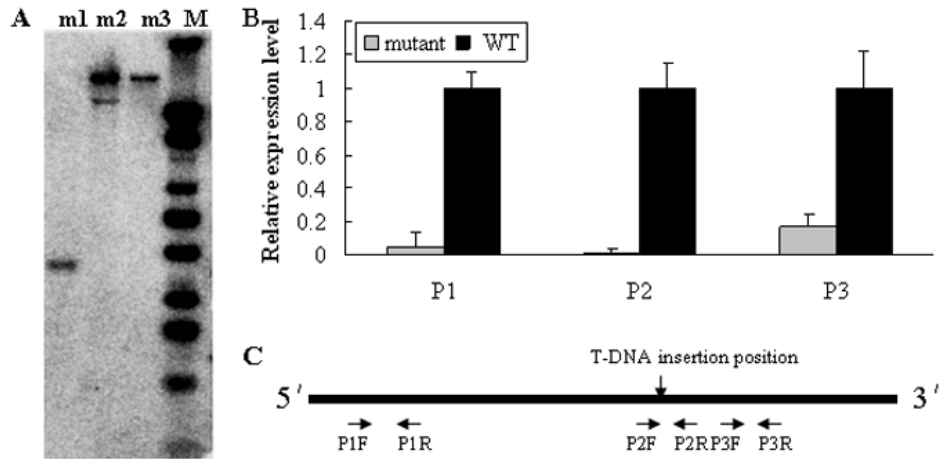

**Supplemental Figure 5.** Identification of *osbzip23* mutant. A, T-DNA copy number of mutant lines checked. m1 is *osbzip23* mutant and the other two mutant lines are for other *osbZIP* genes. B, Relative transcript levels of the *Osbzip23* genes in upstream (P1), across (P2) and downstream of the insertion site checked by real-time PCR. C, Schematic diagram of the amplification regions of the primers used in (B).

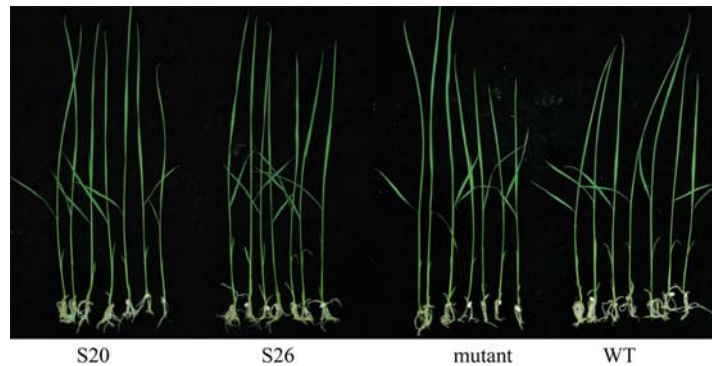

**Supplemental Figure 5** Phenotype of *Osbzip23* transgenic plants and WT grown on normal MS medium for 10 days.

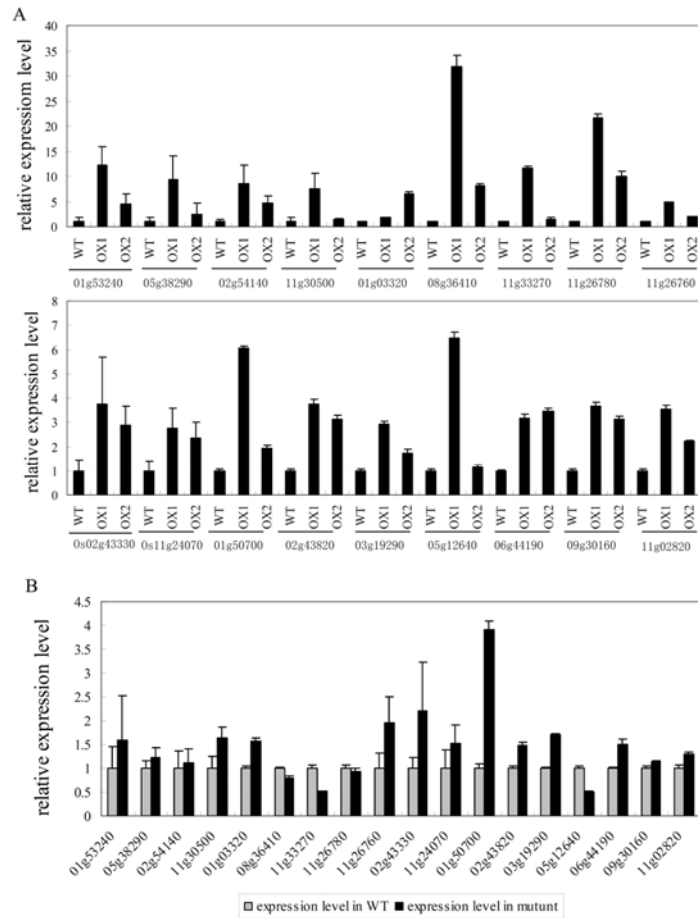

**Supplemental Figure 6** Confirmation of additional genes with expression level changed in the *OsbZIP23* overexpressors (A) and mutant (B) by real time PCR. This result is an addition to the data in Figure 8.
